# Supplementary material
Source: publisher figshare collection journal article supplement (https://gsajournals.figshare.com/articles/dataset/_/8307248)
Supplement: Supplementary file 1 [file 1]

**Table S1. Strains used in this study**

| Strain   | Genotype                                                                                                                                                                                   | Figure                                  |
|----------|--------------------------------------------------------------------------------------------------------------------------------------------------------------------------------------------|-----------------------------------------|
| AP152    | <i>mat1M-smf0 KΔ::ade6<sup>+</sup> his2 leu1-32 ade6-210 ura4-D18</i>                                                                                                                      | 4A                                      |
| SP1152   | <i>mat1M-smf0 REIIΔ mat2P::ura4<sup>+</sup> ade6-210 ura4-D18</i>                                                                                                                          | 2C; S2D                                 |
| SPA03    | <i>mat1M-smf0 his2 leu1-32 ura4 ade6-216 otr1R:ura4<sup>+</sup> pds5::KAN</i>                                                                                                              | 3A, B; S3                               |
| SPA10    | <i>h<sup>+</sup> leu1-32 ade6 ura4-D18 otr1R:ura4<sup>+</sup> pds5::KAN ago1::KAN</i>                                                                                                      | S3                                      |
| SPA13    | <i>mat1M-smf0 REIIΔ mat2P::ura4<sup>+</sup> his2::NAT ade6-216 ura4-D18 pds5::KAN</i>                                                                                                      | 2B; 3C; 7B                              |
| SPA15    | <i>mat1M-smf0 REIIΔ mat2P::ura4<sup>+</sup> his2::NAT ade6-210 ura4-D18 rpl42(sP56Q)-CYH pds5::KAN</i>                                                                                     | 1D, E; 2B, C; 3C; 6A; 7A, D, F; S2D; S5 |
| SPA17    | <i>mat1M-smf0 REIIΔ mat2P::ura4<sup>+</sup> his2::NAT ade6-216 ura4 rpl42(sP56Q)-CYH pds5::KAN ago1::KAN</i>                                                                               | S2D                                     |
| SPA20    | <i>mat1M-smf0 REIIΔ mat2P::ura4<sup>+</sup> his2::NAT ade6-210 ura4-D18 rpl42(sP56Q)-CYH pds5::KAN</i>                                                                                     | 2C                                      |
| SPA21    | <i>mat1M-smf0 REIIΔ mat2P::ura4<sup>+</sup> his2::NAT ade6-210 ura4-D18 rpl42(sP56Q)-CYH pds5::KAN</i>                                                                                     | 2C                                      |
| SPA24    | <i>mat1M-smf0 his2 leu1-32 ura4-DSE ade6-210 otr1R:ura4<sup>+</sup> pds5-GFP&gt;KAN</i>                                                                                                    | 5; S4                                   |
| SPA52    | <i>mat1M-smf0 REIIΔ mat2P::ura4<sup>+</sup> his2::NAT rpl42(sP56Q)-CYH ade6-216 ura4-D18 psc3-4T-GFP&gt;KAN</i>                                                                            | 7A                                      |
| SPA61    | <i>mat1M-smf0 his2 leu1-32 ura4-DSE ade6-216 otr1R:ura4<sup>+</sup> pds5-GFP&gt;KAN swi6::NAT</i>                                                                                          | 5                                       |
| SPA71    | <i>mat1M-smf0 his2 leu1-32 ura4-DSE ade6-210 otr1R:ura4<sup>+</sup> pds5-GFP&gt;KAN clr4::KAN</i>                                                                                          | 5                                       |
| SPA78    | <i>h90 his2 leu1-32 ade6-216 ura4 Kint2:ura4<sup>+</sup> pds5::KAN</i>                                                                                                                     | S2A, C                                  |
| SPA79    | <i>h90 his2 leu1-32 ade6-216 ura4 Kint2:ura4<sup>+</sup> pds5::KAN</i>                                                                                                                     | S2A                                     |
| SPA82    | <i>h90 his2 leu1-32 ade6-216 ura4 Kint2:ura4<sup>+</sup></i>                                                                                                                               | S2A, C                                  |
| SPA83    | <i>h90 his2 leu1-32 ade6-210 ura4 Kint2:ura4<sup>+</sup></i>                                                                                                                               | S2A                                     |
| SPDF662  | <i>mat1M-smf0 REIIΔ mat2P::ura4<sup>+</sup> his2::NAT ura4-D18 ade6-210</i>                                                                                                                | 2B; 3C; 7B                              |
| SPDF734  | <i>mat1M-smf0 REIIΔ mat2P::ura4<sup>+</sup> his2::NAT rpl42(sP56Q)-CYH ade6-210 ura4-D18</i>                                                                                               | 1D, E; 2A, B; 3C; 6A; 7A, C, E; S1B; S5 |
| SPDF735  | <i>mat1M-smf0 REIIΔ mat2P::ura4<sup>+</sup> his2::NAT rpl42(sP56Q)-CYH ade6-210 ura4</i>                                                                                                   | 2B; 3C; 7E                              |
| SPDF1223 | <i>mat1M-smf0 REIIΔ mat2P::ura4<sup>+</sup> ura4-D18 ade6-210 dhml1::HYG</i>                                                                                                               | 1D, E; S1B                              |
| SPDF1417 | <i>mat1M-smf0 his2 leu1 ura4 otr1R:ura4<sup>+</sup> rad21-GFP&lt;LEU2</i>                                                                                                                  | S4                                      |
| SPDF2044 | <i>mat1M-smf0 REIIΔ mat2P::ura4<sup>+</sup> leu1-32 his2::NAT rpl42(sP56Q)-CYH ade6-216 ura4-D18 rpn10::KAN</i>                                                                            | 1D, E                                   |
| SPDF2068 | <i>mat1M-smf0 REIIΔ mat2P::ura4<sup>+</sup> leu1-32 his2::NAT rpl42(sP56Q)-CYH ade6-216 ura4-D18 rpl39::KAN</i>                                                                            | 1D, E; S1B                              |
| SPDF2080 | <i>mat1M-smf0 REIIΔ mat2P::ura4<sup>+</sup> his2::NAT ade6-216 ura4-D18 rpl2102::KAN</i>                                                                                                   | 1D, E; S1B                              |
| SPDF2084 | <i>mat1M-smf0 REIIΔ mat2P::ura4<sup>+</sup> his2::NAT ade6-210 ura4-D18 rpl502::KAN</i>                                                                                                    | 1D, E                                   |
| SPDF2110 | <i>mat1M-smf0 REIIΔ mat2P::ura4<sup>+</sup> his2::NAT ura4-D18 ade6-210 dhm2::KAN</i>                                                                                                      | 1D, E                                   |
| SPDF2117 | <i>mat1M-smf0 REIIΔ mat2P::ura4<sup>+</sup> his2::NAT ura4-D18 ade6-210 yap18::KAN</i>                                                                                                     | 1D, E                                   |
| SPDF2154 | <i>mat1M-smf0 REIIΔ mat2P::ura4<sup>+</sup> his2::NAT ade6-210 Padh1-rec8-HA&gt;ura4<sup>+</sup> rad21::ura4<sup>+</sup> psc3::KAN Padh41-rec11&gt;ura4<sup>+</sup></i>                    | 7C, D, E                                |
| SPDF2157 | same as SPDF2154                                                                                                                                                                           | 7B, E                                   |
| SPDF2176 | <i>mat1M-smf0 REIIΔ mat2P::ura4<sup>+</sup> his2::NAT ade6-216 ura4-D18 Padh1-rec8-HA&gt;ura4<sup>+</sup></i>                                                                              | 7C                                      |
| SPDF2208 | <i>mat1M-smf0 REIIΔ mat2P::ura4<sup>+</sup> his2::NAT ade6-210 ura4-D18 Padh1-rec8-HA&gt;ura4<sup>+</sup> rad21::ura4<sup>+</sup> psc3::KAN Padh41-rec11&gt;ura4<sup>+</sup> pds5::HYG</i> | 7F                                      |
| SPDF2209 | same as SPDF2208                                                                                                                                                                           | 7D, E, F                                |
| SPDF2210 | same as SPDF2208                                                                                                                                                                           | 7E, F                                   |
| SPDF2234 | <i>mat1M-smf0 REIIΔ mat2P::ura4<sup>+</sup> his2::NAT ade6-216 ura4-D18 hrk1::KAN</i>                                                                                                      | 6A                                      |
| SPDF2244 | <i>mat1M-smf0 REIIΔ mat2P::ura4<sup>+</sup> his2::NAT leu1-32 ade6-210 ura4-D18 rpl42(sP56Q)-CYH pds5::HYG wpl1::KAN</i>                                                                   | S5                                      |
| SPDF2246 | <i>mat1M-smf0 REIIΔ mat2P::ura4<sup>+</sup> his2::NAT ade6-210 ura4-D18 pds5::HYG</i>                                                                                                      | 2B; 3C; 7E, F                           |
| SPDF2247 | <i>h<sup>+</sup> leu1-32 ade6-210 ura4-D18 pds5::HYG</i>                                                                                                                                   | 4A                                      |

|          |                                                                                                                                              |                               |
|----------|----------------------------------------------------------------------------------------------------------------------------------------------|-------------------------------|
| SPDF2250 | <i>mat1M-smΔ0 REIIΔ mat2P::ura4<sup>+</sup> his2::NAT rpl42(sP56Q)-CYH ade6-216 ura4-D18 rad21-K1&gt;ura4::HYG</i>                           | 7A                            |
| SPDF2257 | <i>h90 his2 leu1-32 ade6-210 ura4-DSE Kint2::ura4<sup>+</sup> ago1::KAN pds5::HYG</i>                                                        | S2C                           |
| SPDF2293 | <i>mat1M-smΔ0 REIIΔ mat2P::ura4<sup>+</sup> his2::NAT leu1-32 ade6-210 ura4-D18 pds5::HYG</i>                                                | 2A; 7E, F                     |
| SPDF2294 | <i>mat1M-smΔ0 leu1-32 ade6-210 ura4-D18 KΔ::ura4<sup>+</sup></i>                                                                             | S2B                           |
| SPDF2295 | <i>mat1M-smΔ0 leu1-32 ade6-216 ura4-D18 KΔ::ura4<sup>+</sup> pds5::HYG</i>                                                                   | S2A, B                        |
| SPDF2296 | <i>mat1M-smΔ0 leu1-32 ade6-210 ura4-D18 KΔ::ura4<sup>+</sup> pds5::HYG</i>                                                                   | S2A, B                        |
| SPDF2297 | <i>mat1M-smΔ0 leu1-32 ade6-216 ura4-D18 KΔ::ura4<sup>+</sup></i>                                                                             | S2A, B                        |
| SPDF2298 | <i>mat1M-smΔ0 leu1-32 ade6-210 ura4-D18 KΔ::ura4<sup>+</sup></i>                                                                             | S2A, B                        |
| SPDF2299 | <i>mat1M-smΔ0 leu1-32 ade6-216 ura4-D18 KΔ::ura4<sup>+</sup> pds5::HYG</i>                                                                   | S2B                           |
| SPDF2326 | <i>mat1M-smΔ0 KΔ::ade6<sup>+</sup> his2 leu1-32 ade6-210 ura4-D18</i>                                                                        | 4B                            |
| SPDF2327 | <i>mat1M-smΔ0 KΔ::ade6<sup>+</sup> his2 leu1-32 ade6-210 ura4-D18 pds5::HYG</i>                                                              | 4B                            |
| SPDF2328 | <i>mat1M-smΔ0 KΔ::ade6<sup>+</sup> his2 leu1-32 ade6-210 ura4-D18 pds5::HYG</i>                                                              | 4B                            |
| SPDF2329 | <i>mat1M-smΔ0 KΔ::ade6<sup>+</sup> his2 leu1-32 ade6-210 ura4-D18</i>                                                                        | 4B                            |
| SPDF2330 | <i>mat1M-smΔ0 KΔ::ade6<sup>+</sup> his2 leu1-32 ade6-210 ura4-D18 pds5::HYG</i>                                                              | 4B                            |
| SPDF2331 | <i>mat1M-smΔ0 KΔ::ade6<sup>+</sup> his2 leu1-32 ade6-210 ura4-D18</i>                                                                        | 4B                            |
| SPDF2354 | <i>mat1M-smΔ0 REIIΔ mat2P::ura4<sup>+</sup> his2::NAT ade6-210 ura4-D18 psm3(KKQQ)&gt;NAT</i>                                                | 6B                            |
| SPDF2357 | <i>mat1M-smΔ0 REIIΔ mat2P::ura4<sup>+</sup> his2::NAT leu1 ade6-210 ura4-D18 rpl42(sP56Q)-CYH wpl1::KAN<br/>esol::LEU2 psm3(KKQQ)&gt;NAT</i> | 6B                            |
| SPDF2359 | <i>mat1M-smΔ0 REIIΔ mat2P::ura4<sup>+</sup> his2::NAT leu1 ade6-210 ura4-D18 pds5::HYG esol::LEU2</i>                                        | S5                            |
| SPDF2361 | <i>mat1M-smΔ0 REIIΔ mat2P::ura4<sup>+</sup> his2::NAT leu1 ade6-210 ura4-D18 pds5::HYG wpl1::KAN esol::LEU2</i>                              | S5                            |
| SPDF2363 | <i>mat1M-smΔ0 REIIΔ mat2P::ura4<sup>+</sup> his2::NAT leu1 ade6-210 ura4-D18 esol::LEU2 psm3(KKQQ)&gt;NAT</i>                                | 6B                            |
| SPDF2390 | <i>mat1M-smΔ0 REIIΔ mat2P::ura4<sup>+</sup> his2::NAT leu1 ade6-210 ura4-D18 wpl1::KAN</i>                                                   | 6A                            |
| SPDF2391 | <i>mat1M-smΔ0 REIIΔ mat2P::ura4<sup>+</sup> his2::NAT leu1 ade6-210 ura4-D18 esol::LEU2 wpl1::KAN</i>                                        | 6A, B                         |
| SPDF2412 | <i>mat1M-smΔ0 REIIΔ mat2P::ura4<sup>+</sup> his2::NAT ade6-210 ura4-D18 pds5::KAN</i>                                                        | 6B, D                         |
| SPDF2413 | <i>mat1M-smΔ0 REIIΔ mat2P::ura4<sup>+</sup> his2::NAT leu1 ade6-210 ura4-D18 rpl42(sP56Q)-CYH pds5::KAN</i>                                  | 6C, D                         |
| SPDF2414 | <i>mat1M-smΔ0 REIIΔ mat2P::ura4<sup>+</sup> his2::NAT ade6-210 ura4-D18 rpl42(sP56Q)-CYH pds5::KAN</i>                                       | 6D                            |
| SPDF2415 | <i>mat1M-smΔ0 REIIΔ mat2P::ura4<sup>+</sup> his2::NAT ade6-210 ura4-D18 pds5::KAN psm3(KKQQ)&gt;NAT</i>                                      | 6B, D                         |
| SPDF2416 | <i>mat1M-smΔ0 REIIΔ mat2P::ura4<sup>+</sup> his2::NAT ade6-210 ura4-D18 pds5::KAN psm3(KKQQ)&gt;NAT</i>                                      | 6D                            |
| SPDF2417 | <i>mat1M-smΔ0 REIIΔ mat2P::ura4<sup>+</sup> his2::NAT ade6-210 ura4-D18 pds5::KAN psm3(KKQQ)&gt;NAT</i>                                      | 6C, D                         |
| SPF223   | <i>mat1M-smΔ0 his2 leu1-32 ura4-DSE ade6-210 otr1R:ura4<sup>+</sup> ago1::KAN</i>                                                            | 7B                            |
| SPHC221  | <i>mat1M-smΔ0 his2 leu1-32 ura4-DSE ade6-210 otr1R:ura4<sup>+</sup> clr4::KAN</i>                                                            | S2D; S3                       |
| SPHC316  | <i>mat1M-smΔ0 his2 leu1-32 ura4-DSE ade6-210 otr1R:ura4<sup>+</sup> ago1::KAN</i>                                                            | S3                            |
| SPK423   | <i>h90 his2 leu1-32 ade6-210 ura4-DSE Kint2::ura4<sup>+</sup> clr4::KAN</i>                                                                  | S2C                           |
| SPNT572  | <i>mat1M-smΔ0 REIIΔ mat2P::ura4<sup>+</sup> ade6-210 ura4 leu1-32 clr4::KAN</i>                                                              | 1D, E; 2A; 6A; 7A;<br>S1B; S5 |
| SPR156   | <i>mat1M-smΔ0 his2 leu1-32 ura4-DSE ade6-210 otr1R:ura4<sup>+</sup></i>                                                                      | 3A, B; S2D; S3                |
| SPT1294  | <i>h90 his2 leu1-32 ade6-210 ura4-DSE Kint2::ura4<sup>+</sup> ago1::KAN</i>                                                                  | S2C                           |
| SPTA256  | <i>mat1M-smΔ0 his2 leu1-32 ura4 ade6 psc3-GFP&gt;KAN</i>                                                                                     | S4                            |
| SPVC566  | <i>mat1M-smΔ0 REIIΔ mat2P::ura4<sup>+</sup> his2::NAT ade6-216 ura4-D18 rpl42(sP56Q)-CYH ago1::KAN</i>                                       | S2D                           |

Table S2. Single deletion strains selected for further validation

| Plate #   | Gene ID       | Name           | Score $\geq 2$ | Unpublished | Genotype | Haploid Meiosis $\geq 2\%$ | Variegation |
|-----------|---------------|----------------|----------------|-------------|----------|----------------------------|-------------|
| V4-P01-35 | SPAC10F6.06   | <i>vip1</i>    | NO             |             |          |                            |             |
| V4-P01-44 | SPAC110.02    | <i>pds5</i>    | YES            | YES         | YES      | YES                        | YES         |
| V4-P04-16 | SPAC17C9.15c  | <i>dhm2</i>    | YES            | YES         | YES      | YES                        | NO          |
| V4-P05-50 | SPAC1B3.17    | <i>clr2</i>    | YES            | NO          |          |                            |             |
| V4-P05-73 | SPAC1F7.01c   | <i>spt6</i>    | NO             |             |          |                            |             |
| V4-P09-03 | SPAC31G5.07   | <i>dni1</i>    | NO             |             |          |                            |             |
| V4-P10-94 | SPAC589.02c   | <i>med13</i>   | YES            | YES         | YES      | NO                         |             |
| V4-P11-39 | SPAC637.10c   | <i>rpn10</i>   | YES            | YES         | YES      | YES                        | YES         |
| V4-P11-48 | SPAC664.01c   | <i>swi6</i>    | YES            | NO          |          |                            |             |
| V4-P11-49 | SPAC664.02c   | <i>arp8</i>    | NO             |             |          |                            |             |
| V4-P11-67 | SPAC694.06c   | <i>mrc1</i>    | YES            | NO          |          |                            |             |
| V4-P13-19 | SPAC959.08    | <i>rpl2102</i> | YES            | YES         | YES      | YES                        | YES         |
| V4-P13-60 | SPAP27G11.10c | <i>nup184</i>  | YES            | YES         | NO       |                            |             |
| V4-P14-23 | SPAPJ691.02   |                | NO             |             |          |                            |             |
| V4-P14-47 | SPBC1105.02c  | <i>lys4</i>    | NO             |             |          |                            |             |
| V4-P14-56 | SPBC115.02c   | <i>afg1</i>    | NO             |             |          |                            |             |
| V4-P14-83 | SPBC11C11.09c | <i>rpl502</i>  | YES            | YES         | YES      | YES                        | YES         |
| V4-P15-78 | SPBC15D4.03   | <i>slm9</i>    | YES            | NO          |          |                            |             |
| V4-P16-39 | SPBC16C6.10   | <i>chp2</i>    | YES            | NO          |          |                            |             |
| V4-P16-50 | SPBC16E9.13   | <i>ksp1</i>    | NO             |             |          |                            |             |
| V4-P17-25 | SPBC1773.08c  | <i>omh4</i>    | NO             |             |          |                            |             |
| V4-P17-96 | SPBC19C7.02   | <i>ubr1</i>    | NO             |             |          |                            |             |
| V4-P18-09 | SPBC19F8.03c  | <i>yap18</i>   | YES            | YES         | YES      | YES                        | NO          |
| V4-P19-94 | SPBC2D10.17   | <i>clr1</i>    | YES            | NO          |          |                            |             |
| V4-P20-05 | SPBC2F12.11c  | <i>rep2</i>    | NO             |             |          |                            |             |
| V4-P20-11 | SPBC2G2.03c   | <i>sbh1</i>    | NO             |             |          |                            |             |
| V4-P20-48 | SPBC31F10.13c | <i>hip1</i>    | YES            | NO          |          |                            |             |
| V4-P21-70 | SPBC428.07    | <i>meu6</i>    | YES            | NO          |          |                            |             |
| V4-P21-71 | SPBC428.08c   | <i>clr4</i>    | YES            | NO          |          |                            |             |
| V4-P22-44 | SPBC609.05    | <i>pob3</i>    | YES            | NO          |          |                            |             |
| V4-P23-09 | SPBC800.03    | <i>clr3</i>    | YES            | NO          |          |                            |             |
| V4-P24-03 | SPBP35G2.10   | <i>mit1</i>    | YES            | NO          |          |                            |             |
| V4-P24-11 | SPBP4H10.05c  | <i>spe2</i>    | NO             |             |          |                            |             |
| V4-P24-87 | SPCC11E10.08  | <i>rik1</i>    | YES            | NO          |          |                            |             |
| V4-P25-47 | SPCC1393.09c  | <i>gir2</i>    | YES            | YES         | NO       |                            |             |
| V4-P27-34 | SPCC338.16    | <i>pof3</i>    | YES            | NO          |          |                            |             |
| V4-P28-12 | SPCC63.06     |                | YES            | YES         | YES      | NO                         |             |
| V4-P28-23 | SPCC663.04    | <i>rpl39</i>   | YES            | YES         | YES      | YES                        | YES         |
| V4-P29-18 | SPCP1E11.10   | <i>dhm1</i>    | YES            | YES         | YES      | YES                        | YES         |
| V4-P29-60 | SPAC12G12.15  | <i>sif3</i>    | NO             |             |          |                            |             |
| V4-P30-77 | SPAC25A8.01c  | <i>fft3</i>    | YES            | NO          |          |                            |             |
| V4-P30-78 | SPAC25B8.05   | <i>deg1</i>    | NO             |             |          |                            |             |

|           |              |                |     |     |    |
|-----------|--------------|----------------|-----|-----|----|
| V4-P31-02 | SPAC29A4.18  | <i>prw1</i>    | NO  |     |    |
| V4-P31-62 | SPAC4F10.13c | <i>mpd2</i>    | NO  |     |    |
| V4-P32-67 | SPBC1347.02  | <i>ani1</i>    | YES | NO  |    |
| V4-P33-51 | SPBC21D10.10 | <i>bdc1</i>    | NO  |     |    |
| V4-P34-25 | SPBC3H7.05c  |                | NO  |     |    |
| V4-P34-46 | SPBC56F2.02  | <i>rpl1901</i> | NO  |     |    |
| V4-P35-10 | SPCC1223.15c | <i>spc19</i>   | YES | YES | NO |
| V4-P35-73 | SPCC24B10.04 |                | NO  |     |    |
| V4-P36-45 | SPCC613.12c  | <i>raf1</i>    | YES | NO  |    |
| V4-P36-69 | SPCC970.07c  | <i>raf2</i>    | YES | NO  |    |

**Table S3. Results of validation assays**

| Plate     | ID            | Name           | Score | Iodine staining* |      | Growth |         |
|-----------|---------------|----------------|-------|------------------|------|--------|---------|
|           |               |                |       | 5S               | –URA | +FOA** | –URA*** |
| V4-P05-50 | SPAC1B3.17    | <i>clr2</i>    | 4     | 1                | 1    | 1      | 1       |
| V4-P11-48 | SPAC664.01c   | <i>swi6</i>    | 4     | 1                | 1    | 1      | 1       |
| V4-P16-39 | SPBC16C6.10   | <i>chp2</i>    | 4     | 1                | 1    | 1      | 1       |
| V4-P19-94 | SPBC2D10.17   | <i>clr1</i>    | 4     | 1                | 1    | 1      | 1       |
| V4-P21-71 | SPBC428.08c   | <i>clr4</i>    | 4     | 1                | 1    | 1      | 1       |
| V4-P23-09 | SPBC800.03    | <i>clr3</i>    | 4     | 1                | 1    | 1      | 1       |
| V4-P24-03 | SPBP35G2.10   | <i>mit1</i>    | 4     | 1                | 1    | 1      | 1       |
| V4-P24-87 | SPCC11E10.08  | <i>rik1</i>    | 4     | 1                | 1    | 1      | 1       |
| V4-P36-45 | SPCC613.12c   | <i>raf1</i>    | 4     | 1                | 1    | 1      | 1       |
| V4-P36-69 | SPCC970.07c   | <i>raf2</i>    | 4     | 1                | 1    | 1      | 1       |
| V4-P13-19 | SPAC959.08    | <i>rpl2102</i> | 3.5   | 1                | 1    | 0.5    | 1       |
| V4-P21-70 | SPBC428.07    | <i>meu6</i>    | 3.5   | 1                | 1    | 0.5    | 1       |
| V4-P29-18 | SPCP1E11.10   | <i>dhm1</i>    | 3.5   | 1                | 1    | 0.5    | 1       |
| V4-P04-16 | SPAC17C9.15c  | <i>dhm2</i>    | 3     | 1                | 1    | 0      | 1       |
| V4-P28-23 | SPCC663.04    | <i>rpl39</i>   | 3     | 0.5              | 1    | 1      | 0.5     |
| V4-P30-77 | SPAC25A8.01c  | <i>fft3</i>    | 3     | 0.5              | 1    | 0.5    | 1       |
| V4-P01-44 | SPAC110.02    | <i>pds5</i>    | 2.5   | 0.5              | 1    | 0.5    | 0.5     |
| V4-P11-67 | SPAC694.06c   | <i>mrc1</i>    | 2.5   | 0.5              | 1    | 0      | 1       |
| V4-P15-78 | SPBC15D4.03   | <i>slm9</i>    | 2.5   | 0.5              | 0.5  | 1      | 0.5     |
| V4-P20-48 | SPBC31F10.13c | <i>hip1</i>    | 2.5   | 0.5              | 1    | 0.5    | 0.5     |
| V4-P28-12 | SPCC63.06     |                | 2.5   | 0.5              | 1    | 0      | 1       |
| V4-P22-44 | SPBC609.05    | <i>pob3</i>    | 2.5   | 0.5              | 0.5  | 0.5    | 1       |
| V4-P32-67 | SPBC1347.02   | <i>ani1</i>    | 2.5   | 0.5              | 1    | 0      | 1       |
| V4-P10-94 | SPAC589.02c   | <i>med13</i>   | 2     | 0                | 1    | 0      | 1       |
| V4-P11-39 | SPAC637.10c   | <i>rpn10</i>   | 2     | 0                | 1    | 0      | 1       |
| V4-P14-83 | SPBC11C11.09c | <i>rpl502</i>  | 2     | 0                | 1    | 0.5    | 0.5     |
| V4-P18-09 | SPBC19F8.03c  | <i>yap18</i>   | 2     | 0.5              | 1    | 0      | 0.5     |
| V4-P27-34 | SPCC338.16    | <i>pof3</i>    | 2     | 0.5              | 0.5  | 0      | 1       |

NB: Only factors with scores  $\geq 2$  are shown.

\* Iodine staining in PMG 5S and PMG –URA was scored as follows: 1=black; 0.5=brown/variegated; 0=yellow.

\*\* Growth in PMG +FOA was scored as follows: 1=none; 0.5=medium; 0=full.

\*\* Growth in PMG –URA was scored as follows: 1=full; 0.5=medium; 0=none.

**Table S4. Oligonucleotides used in this study**

| PCR product          | Sequence 5'–3'                                         | Application            |
|----------------------|--------------------------------------------------------|------------------------|
| <i>act1</i>          | TCATCAGCCATTCTTTTCGTC<br>ACACATTCAACCATTTGGCTTC        | RT-qPCR                |
| <i>ade6</i>          | CCTGCTCGTCTTCCCTTCTC<br>CGAGGAGCAATTCGTTGAG            | ChIP-qPCR              |
| <i>cenH</i>          | AGTAATTCTATGTACCCGTGC<br>CGTCGTCACCAATCGATCTT          | ChIP-qPCR &<br>RT-qPCR |
| <i>cc</i>            | CAGACAATCGCATGGTACTATC<br>AGGTGAAGCGTAAGTGAGTG         | ChIP-qPCR              |
| <i>chrIII-0.36Mb</i> | TAGCTTCGGAAGGATGGAAC<br>TTTCGGTACGCGACACTCTC           | ChIP-qPCR              |
| <i>dg</i>            | AATTGTGGTGGTGTGGTAATAC<br>GGGTTCATCGTTTCCATTGAG        | ChIP-qPCR &<br>RT-qPCR |
| <i>fbp1</i>          | AATGACAATTCCCCACTAGCC<br>ACTTCAGCTAGGATTCACCTGG        | ChIP-qPCR              |
| <i>leu1</i>          | CTGGCAAGGGCATTGTTAAT<br>CCACGTCCACCAATTGAAGT           | RT-qPCR                |
| <i>mat2-Pc</i>       | ATCAGGAGATTGGGCAGGTG<br>TGCGCTCTAACTTGGAATT            | ChIP-qPCR &<br>RT-qPCR |
| <i>mat2P-up</i>      | ACAAATAACATGTTTCCTTCGCCT<br>TCCGTTGTTGTATGGGTCCT       | ChIP-qPCR              |
| <i>mat2P-down</i>    | GCATTGTAGATCATATCCGTCGA<br>ATACAGATGCCAATAACTTCGTG     | ChIP-qPCR              |
| <i>ura4</i>          | TTGGCTACTGGTTCCTACACAGAG<br>TCGCTACCGCAGTTTACAATCACTTC | ChIP-qPCR &<br>RT-qPCR |
